# Supplementary material for: Arterial events, venous thromboembolism, thrombocytopenia, and bleeding after vaccination with Oxford-AstraZeneca ChAdOx1-S in Denmark and Norway: population based cohort study
Source: PubMed Central journal article supplement — BMJ. 2021 May 6;373:n1114. doi: 10.1136/bmj.n1114 (PMC8097496; doi:10.1136/bmj.n1114), 2021-05-06
Supplement: pota065824.ww.pdf [file pota065824.ww.pdf]

**Arterial events, venous thromboembolism,  
thrombocytopenia, and bleeding after  
Oxford-AstraZeneca COVID-19 vaccination:  
A Danish-Norwegian cohort study**

SUPPLEMENTARY MATERIAL

## Appendix. ICD-10 Diagnosis codes used in the study.

| <b>Arterial vascular events</b>                   |                   |                                                                                              |
|---------------------------------------------------|-------------------|----------------------------------------------------------------------------------------------|
| <b>Cardiac events</b>                             | I21               | Acute myocardial infarction (AMI)                                                            |
|                                                   | I20, 23-25        | Ischaemic heart disease without AMI                                                          |
| <b>Cerebrovascular events</b>                     | I60               | Subarachnoid haemorrhage (SAH)                                                               |
|                                                   | I61               | Intracerebral haemorrhage (ICH)                                                              |
|                                                   | I62               | Unspecified nontraumatic intracranial haemorrhage                                            |
|                                                   | I63               | Cerebral infarction                                                                          |
|                                                   | I636              | Cerebral infarction due to cerebral venous thrombosis, nonpyogenic                           |
|                                                   | I64               | Stroke, unspecified                                                                          |
|                                                   | I65-I66           | Occlusion/stenosis of precerebral or cerebral arteries, not resulting in cerebral infarction |
| <b>Other necrotising vasculitis</b>               | G450-G453         | Transient cerebral ischaemic attack                                                          |
|                                                   | M31               | Other necrotising vasculitis                                                                 |
|                                                   | M310              | Angiitis hypersensitiva                                                                      |
|                                                   | M311              | Microangiopathia thrombotica                                                                 |
|                                                   | M318              | Other necrotising vasculitis                                                                 |
| <b>Venous thromboembolism</b>                     |                   |                                                                                              |
| <b>Pulmonary embolism</b>                         | I26               | Pulmonary embolism (PE)                                                                      |
| <b>Lower limb venous thrombosis</b>               | I801              | Thrombophlebitis of femoral vein                                                             |
|                                                   | I802              | Deep thrombophlebitis of veins in leg                                                        |
|                                                   | I803              | Unspecified deep thrombophlebitis in lower limb                                              |
| <b>Splanchnic thrombosis</b>                      | I81               | Portal thrombosis                                                                            |
|                                                   | I820              | Budd-Chiari syndrome                                                                         |
|                                                   | I823              | Embolism and thrombosis in renal vein                                                        |
| <b>Cerebral venous thrombosis</b>                 | I676              | Nonpyogenic cerebral venous thrombosis                                                       |
| <b>Other venous thrombosis</b>                    | I828              | Embolism and thrombosis in other specified veins                                             |
|                                                   | I829              | Embolism and thrombosis in non-specified veins                                               |
|                                                   | I822              | Embolism and thrombosis of caval vein                                                        |
| <b>Thrombocytopenia and coagulative disorders</b> |                   |                                                                                              |
| <b>Coagulative disorders</b>                      | D65+68            | Coagulation disorders, purpura                                                               |
|                                                   | D65               | Disseminated intravascular coagulation (DIC)                                                 |
| <b>Thrombocytopenia</b>                           | D693-D696         | Thrombocytopenia                                                                             |
|                                                   | D693              | Idiopathic thrombocytopenic purpura                                                          |
|                                                   | D694              | Other primary thrombocytopenia                                                               |
|                                                   | D695              | Secondary thrombocytopenia                                                                   |
|                                                   | D696              | Thrombocytopenia unspecified                                                                 |
| <b>Bleeding events</b>                            |                   |                                                                                              |
| <b>Haemolytic anaemias</b>                        | D55-57+59         | Haemolytic anaemias                                                                          |
|                                                   | D593              | Haemolytic uremic syndrome                                                                   |
|                                                   | D595              | Paroxysmal nocturnal hemoglobinuria                                                          |
| <b>Bleedings</b>                                  | D62               | Anemias from bleeding                                                                        |
|                                                   | D629              | Anaemia from bleeding, unspecified                                                           |
|                                                   | K922 <sup>a</sup> | Intestinal bleeding                                                                          |
|                                                   | R04               | Bleeding from respiratory tract                                                              |
|                                                   | R31               | Haematuria                                                                                   |
|                                                   | R58               | Bleeding, not specified                                                                      |

<sup>a</sup> Not available in the Norwegian data source.

## Supplementary Table 1

General population incidence rates (using a more recent general population cohort 1 January 2020 to 15 March 2021), observed and expected counts of events, standardized morbidity differences (/100,000 vaccinations), and standardised morbidity ratios of arterial events and venous thromboembolism within 28 days of vaccination in a cohort of 18-65 year old Danish and Norwegian persons (n=281,264) receiving their first administration of the Oxford-AstraZeneca COVID-19 vaccine.

| Outcome                                                                  | Incidence rate <sup>a</sup> |                       | Expected | Standardised morbidity difference <sup>c</sup> | Standardised morbidity ratio |   |
|--------------------------------------------------------------------------|-----------------------------|-----------------------|----------|------------------------------------------------|------------------------------|---|
|                                                                          | DK / NO                     | Observed <sup>b</sup> |          | /100,000 (95% CI)                              | (95% CI)                     |   |
| <b>ARTERIAL EVENTS</b>                                                   | 4.44 / 4.64                 | 83                    | 83       | 0.1 (-6.2 to 7.5)                              | 1.00 (0.80 to 1.24)          | ■ |
| <b>Cardiac events</b>                                                    | 2.82 / 3.49                 | 52                    | 55       | -1.0 (-5.8 to 5.1)                             | 0.95 (0.71 to 1.25)          | ■ |
| Acute myocardial infarction (AMI)                                        | 1.02 / 1.16                 | 20                    | 18       | 0.8 (-2.1 to 4.8)                              | 1.12 (0.68 to 1.73)          | ■ |
| Ischaemic heart disease without AMI                                      | 2.46 / 3.29                 | 46                    | 49       | -1.2 (-5.8 to 4.5)                             | 0.93 (0.68 to 1.24)          | ■ |
| <b>Cerebrovascular events</b>                                            | 1.64 / 1.2                  | 27                    | 28       | -0.4 (-3.8 to 4.1)                             | 0.96 (0.63 to 1.39)          | ■ |
| Cerebral infarction                                                      | 1.13 / 0.74                 | 16                    | 18       | -0.7 (-3.2 to 3.0)                             | 0.90 (0.51 to 1.46)          | ■ |
| Intracerebral haemorrhage (ICH)                                          | 0.21 / 0.16                 | 8                     | 4        | 1.6 (-0.1 to 4.5)                              | 2.17 (0.94 to 4.27)          | ■ |
| Occlusion and stenosis not resulting in cerebral infarction <sup>d</sup> | 0.05 / 0.21                 | n<5                   | 3        | NR                                             | NR                           |   |
| Stroke, unspecified                                                      | 0.24 / 0.05                 | 0                     | 3        | -1.1 (-1.1 to 0.3)                             | 0.00 (0.00 to 1.26)          |   |
| Subarachnoid haemorrhage (SAH)                                           | 0.12 / 0.09                 | n<5                   | 3        | NR                                             | NR                           |   |
| Transient cerebral ischemic attack                                       | 0.08 / 0.10                 | 0                     | 2        | -0.7 (-0.7 to 0.7)                             | 0.00 (0.00 to 2.01)          |   |
| <b>Other arterial events <sup>e</sup></b>                                | 0.10 / 0.10                 | n<5                   | 2        | NR                                             | NR                           |   |
| <b>VENOUS THROMBOEMBOLISM</b>                                            | 1.55 / 1.3                  | 59                    | 30       | 10.9 (5.6 to 17.2)                             | 1.99 (1.51 to 2.57)          | ■ |
| <b>Cerebral venous thrombosis</b>                                        | 0.01 / 0.01                 | 7                     | 0        | 2.5 (0.9 to 5.2)                               | 20.10 (8.08 to 41.42)        | ■ |
| <b>Pulmonary embolism (PE)</b>                                           | 0.6 / 0.63                  | 21                    | 12       | 3.2 (0.2 to 7.3)                               | 1.69 (1.05 to 2.59)          | ■ |
| <b>Lower limb venous thrombosis</b>                                      | 0.78 / 0.45                 | 22                    | 13       | 3.4 (0.3 to 7.6)                               | 1.71 (1.07 to 2.58)          | ■ |
| Deep thrombophlebitis of veins in legs                                   | 0.29 / 0.36                 | 10                    | 7        | 1.3 (-0.7 to 4.4)                              | 1.52 (0.73 to 2.79)          | ■ |
| Unspecified deep thrombophlebitis in lower limb                          | 0.53 / 0.04                 | 12                    | 6        | 2.2 (0.0 to 5.5)                               | 1.95 (1.01 to 3.40)          | ■ |
| <b>Splanchnic thrombosis</b>                                             | 0.05 / 0.06                 | n<5                   | 1        | NR                                             | NR                           |   |
| <b>Other venous thrombosis <sup>f</sup></b>                              | 0.29 / 0.36                 | 12                    | 7        | 1.9 (-0.2 to 5.2)                              | 1.75 (0.91 to 3.06)          | ■ |

Abbreviations:

CI: confidence interval; DK, Denmark; NO, Norway; NR, Not reported due to privacy regulations.

<sup>a</sup> Incidence rate per 1,000 person years in the general population.

<sup>b</sup> Observed events are not mutually exclusive, i.e. one patient can contribute to two different third-level outcomes. However, two different third-level outcomes would only count once towards a common second-level outcome and similarly only once in a first-level outcome.

<sup>c</sup> Standardised morbidity differences are estimated as excess events per 100,000 vaccine recipients followed for 28 days each by comparing observed to expected events, the latter based on the incidence rates in the general population.

<sup>d</sup> Full name: Occlusion and stenosis of precerebral or cerebral arteries, not resulting in cerebral infarction.

<sup>e</sup> Including angitis hypersensitiva, angitis hypersensitiva with Schönlein-Henochs purpura, Buerger's syndrome, Goodpasture syndrome, microangiopathy thrombotica, other necrotising vasculitis, and thrombotic thrombocytopenic purpura.

<sup>f</sup> Including embolism and thrombosis in non-specified veins, embolism and thrombosis in other specified veins, and embolism and thrombosis of caval vein

## Supplementary Table 2

General population incidence rates (using a more recent general population cohort 1 January 2020 to 15 March 2021), observed and expected counts of events, standardized morbidity differences (/100,000 vaccinations), and standardised morbidity ratios of thrombocytopenia and coagulative disorders and bleeding events within 28 days of vaccination in a cohort of 18-65 year old Danish and Norwegian persons (n=281,264) receiving their first administration of the Oxford-AstraZeneca COVID-19 vaccine.

| Outcome                                           | Incidence rate <sup>a</sup> |                       | Expected | Standardised morbidity difference <sup>c</sup> /100,000 (95% CI) | Standardised morbidity ratio (95% CI) | SMR |
|---------------------------------------------------|-----------------------------|-----------------------|----------|------------------------------------------------------------------|---------------------------------------|-----|
|                                                   | DK / NO                     | Observed <sup>b</sup> |          |                                                                  |                                       |     |
| <b>THROMBOCYTOPENIA AND COAGULATIVE DISORDERS</b> | 0.49 / 0.75                 | 24                    | 14       | 3.5 (0.3 to 7.9)                                                 | 1.66 (1.06 to 2.47)                   | ■   |
| <b>Thrombocytopenia</b>                           | 0.11 / 0.38                 | 17                    | 5        | 4.4 (1.7 to 8.1)                                                 | 3.24 (1.89 to 5.19)                   | ■   |
| Idiopathic thrombocytopenic purpura               | 0.04 / 0.06                 | n<5                   | 1        | NR                                                               | NR                                    |     |
| Other primary thrombocytopenia                    | 0.00 / 0.01                 | 0                     | 0        | -0.1 (-0.1 to 1.3)                                               | 0.00 (0.00 to 24.67)                  |     |
| Secondary thrombocytopenia                        | 0.01 / 0.17                 | NR                    | 2        | NR                                                               | NR                                    |     |
| Thrombocytopenia unspecified                      | 0.07 / 0.20                 | 11                    | 3        | 3.0 (1.0 to 6.2)                                                 | 3.77 (1.88 to 6.75)                   | ■   |
| <b>Coagulative disorders</b>                      | 0.39 / 0.39                 | 7                     | 9        | -0.9 (-2.5 to 1.8)                                               | 0.74 (0.30 to 1.53)                   | ■   |
| Coagulative disorders, purpura                    | 0.39 / 0.39                 | 7                     | 9        | -0.9 (-2.5 to 1.8)                                               | 0.74 (0.30 to 1.53)                   | ■   |
| Disseminated intravascular coagulation (DIC)      | 0.01 / 0.02                 | 0                     | 0        | -0.1 (-0.1 to 1.3)                                               | 0.00 (0.00 to 20.87)                  |     |
| <b>BLEEDING EVENTS</b>                            | 2.47 / 2.62                 | 74                    | 52       | 8.1 (2.2 to 15.1)                                                | 1.42 (1.11 to 1.78)                   | ■   |
| <b>Bleedings</b>                                  | 2.38 / 2.55                 | 74                    | 50       | 8.8 (2.9 to 15.8)                                                | 1.47 (1.15 to 1.84)                   | ■   |
| Anemia from bleeding                              | 0.08 / 0.58                 | n<5                   | 8        | NR                                                               | NR                                    |     |
| Bleeding from respiratory tract                   | 0.80 / 0.75                 | 35                    | 15       | 7.5 (3.5 to 12.5)                                                | 2.36 (1.65 to 3.29)                   | ■   |
| Bleeding, not specified                           | 0.19 / 0.05                 | 8                     | 3        | 1.8 (0.2 to 4.7)                                                 | 2.64 (1.14 to 5.19)                   | ■   |
| Hematuria                                         | 1.22 / 1.22                 | 25                    | 24       | 0.2 (-3.1 to 4.6)                                                | 1.02 (0.66 to 1.51)                   | ■   |
| Intestinal bleeding                               | 0.12 / - <sup>d</sup>       | n<5                   | 1        | NR                                                               | NR                                    |     |
| <b>Hemolytic anemias <sup>e</sup></b>             | 0.09 / 0.08                 | 0                     | 2        | -0.8 (-0.8 to 0.6)                                               | 0.00 (0.00 to 1.81)                   |     |

Abbreviations:

CI: confidence interval; DK, Denmark; NO, Norway; NR, Not reported due to privacy regulations.

<sup>a</sup> Incidence rate per 1,000 person years in the general population.

<sup>b</sup> Observed events are not mutually exclusive, i.e. one patient can contribute to two different third-level outcomes. However, two different third-level outcomes would only count once towards a common second-level outcome and similarly only once in a first-level outcome.

<sup>c</sup> Standardised morbidity differences are estimated as excess events per 100,000 vaccine recipients followed for 28 days each by comparing observed to expected events, the latter based on the incidence rates in the general population.

<sup>d</sup> Not available in the Norwegian data source.

<sup>e</sup> Including hemolytic anemia, hemolytic uremic syndrome, and paroxysmal nocturnal haemoglobinuria.

### Supplementary Table 3

Proportion of individuals in the Danish Oxford-AstraZeneca COVID-19 vaccine cohort and in the Danish general population who redeemed a prescription for systemic hormone therapy\* during the 365 days preceding vaccination or 1 January of the given year.

| <b>Age category</b> | <b>Oxford-AstraZeneca,<br/>n/N (%)</b> | <b>2016,<br/>n/N (%)</b> | <b>2017,<br/>n/N (%)</b> | <b>2018,<br/>n/N (%)</b> | <b>2020-2021,<br/>n/N (%)</b> |
|---------------------|----------------------------------------|--------------------------|--------------------------|--------------------------|-------------------------------|
| Total               | 17242/119119 (14.5)                    | 369448/1709814 (21.6)    | 337718/1692934 (19.9)    | 302986/1679309 (18.0)    | 288990/1740062 (16.6)         |
| 18-24               | 6487/111132 (58.3)                     | 136759/241822 (56.6)     | 138740/238417 (58.2)     | 134049/235176 (57.0)     | 128907/243959 (52.8)          |
| 25-29               | 4232/10452 (40.5)                      | 84007/171028 (49.1)      | 72621/166616 (43.6)      | 61719/163852 (37.7)      | 65103/187820 (34.7)           |
| 30-34               | 2086/9531 (21.9)                       | 48073/154673 (31.1)      | 40604/152234 (26.7)      | 34479/150553 (22.9)      | 33595/170612 (19.7)           |
| 35-39               | 1256/11188 (11.2)                      | 34713/164209 (21.1)      | 29630/162923 (18.2)      | 25103/161905 (15.5)      | 20530/159688 (12.9)           |
| 40-44               | 986/13916 (7.1)                        | 27628/187766 (14.7)      | 23396/186816 (12.5)      | 19612/186049 (10.5)      | 15232/180057 (8.5)            |
| 45-49               | 753/15976 (4.7)                        | 18842/192697 (9.8)       | 15841/191886 (8.3)       | 13293/191166 (7.0)       | 11228/194528 (5.8)            |
| 50-54               | 712/16045 (4.4)                        | 11363/208841 (5.4)       | 9663/207929 (4.6)        | 8255/207043 (4.0)        | 7699/203677 (3.8)             |
| 55-59               | 511/17324 (2.9)                        | 4790/182785 (2.6)        | 4287/181807 (2.4)        | 3790/180829 (2.1)        | 4201/193021 (2.2)             |
| 60-65               | 219/13555 (1.6)                        | 3273/205993 (1.6)        | 2936/204306 (1.4)        | 2686/202736 (1.3)        | 2495/206700 (1.2)             |

\* Systemic hormone therapy was defined as the following ATC codes, restricted to systemic administration: G03AA, G03AB, G02BB01, G03HB01 (oral contraceptives, combination therapy) and G03CA

## Supplementary Table 4

General population incidence rates for arterial events and venous thromboembolism in Denmark, stratified by calendar year.

| Outcome                                                                  | 2016   |         |                 | 2017   |         |                 | 2018   |         |                 | 2016-2018 |         |                 | 2020 - March 2021 |         |                 |
|--------------------------------------------------------------------------|--------|---------|-----------------|--------|---------|-----------------|--------|---------|-----------------|-----------|---------|-----------------|-------------------|---------|-----------------|
|                                                                          | Events | 1000 PY | IR <sup>a</sup> | Events | 1000 PY | IR <sup>a</sup> | Events | 1000 PY | IR <sup>a</sup> | Events    | 1000 PY | IR <sup>a</sup> | Events            | 1000 PY | IR <sup>a</sup> |
| <b>ARTERIAL EVENTS</b>                                                   | 16314  | 3408    | 4.79            | 15159  | 3349    | 4.53            | 14017  | 3306    | 4.24            | 45490     | 10063   | 4.52            | 18381             | 4136    | 4.44            |
| <b>Cardiac events</b>                                                    | 10952  | 3416    | 3.21            | 9837   | 3362    | 2.93            | 8816   | 3323    | 2.65            | 29605     | 10102   | 2.93            | 11711             | 4148    | 2.82            |
| Acute myocardial infarction (AMI)                                        | 3498   | 3431    | 1.02            | 3504   | 3383    | 1.04            | 3538   | 3350    | 1.06            | 10540     | 10164   | 1.04            | 4229              | 4164    | 1.02            |
| Ischaemic heart disease without AMI                                      | 9850   | 3418    | 2.88            | 8724   | 3365    | 2.59            | 7561   | 3327    | 2.27            | 26135     | 10111   | 2.58            | 10190             | 4151    | 2.46            |
| <b>Cerebrovascular events</b>                                            | 5407   | 3428    | 1.58            | 5557   | 3379    | 1.64            | 5479   | 3344    | 1.64            | 16443     | 10151   | 1.62            | 6803              | 4160    | 1.64            |
| Cerebral infarction                                                      | 3272   | 3431    | 0.95            | 3486   | 3384    | 1.03            | 3684   | 3350    | 1.10            | 10442     | 10166   | 1.03            | 4694              | 4164    | 1.13            |
| Intracerebral haemorrhage (ICH)                                          | 698    | 3435    | 0.20            | 690    | 3390    | 0.20            | 689    | 3360    | 0.21            | 2077      | 10185   | 0.20            | 860               | 4170    | 0.21            |
| Occlusion and stenosis not resulting in cerebral infarction <sup>b</sup> | 282    | 3436    | 0.08            | 258    | 3391    | 0.08            | 208    | 3361    | 0.06            | 748       | 10188   | 0.07            | 226               | 4171    | 0.05            |
| Stroke, unspecified                                                      | 1460   | 3434    | 0.43            | 1440   | 3388    | 0.42            | 1184   | 3357    | 0.35            | 4084      | 10179   | 0.40            | 1010              | 4170    | 0.24            |
| Subarachnoid haemorrhage (SAH)                                           | 538    | 3435    | 0.16            | 477    | 3391    | 0.14            | 400    | 3360    | 0.12            | 1415      | 10186   | 0.14            | 489               | 4170    | 0.12            |
| Transient cerebral ischemic attack                                       | 223    | 3436    | 0.06            | 226    | 3391    | 0.07            | 240    | 3361    | 0.07            | 689       | 10188   | 0.07            | 314               | 4171    | 0.08            |
| <b>Other arterial events<sup>c</sup></b>                                 | 411    | 3435    | 0.12            | 382    | 3391    | 0.11            | 355    | 3360    | 0.11            | 1148      | 10186   | 0.11            | 411               | 4170    | 0.10            |
| <b>VENOUS THROMBOEMBOLISM</b>                                            | 5005   | 3429    | 1.46            | 5841   | 3380    | 1.73            | 5208   | 3344    | 1.56            | 16054     | 10152   | 1.58            | 6456              | 4159    | 1.55            |
| <b>Cerebral venous thrombosis</b>                                        | 55     | 3436    | 0.02            | 74     | 3392    | 0.02            | 54     | 3361    | 0.02            | 183       | 10189   | 0.02            | 62                | 4171    | 0.01            |
| <b>Pulmonary embolism</b>                                                | 1814   | 3433    | 0.53            | 2122   | 3388    | 0.63            | 1826   | 3356    | 0.54            | 5762      | 10177   | 0.57            | 2501              | 4167    | 0.60            |
| <b>Lower limb venous thrombosis</b>                                      | 2948   | 3432    | 0.86            | 3466   | 3385    | 1.02            | 3124   | 3351    | 0.93            | 9538      | 10167   | 0.94            | 3266              | 4164    | 0.78            |
| Deep thrombophlebitis of veins in legs                                   | 1120   | 3435    | 0.33            | 1206   | 3389    | 0.36            | 1249   | 3358    | 0.37            | 3575      | 10182   | 0.35            | 1219              | 4169    | 0.29            |
| Unspecified deep thrombophlebitis in lower limb                          | 2091   | 3433    | 0.61            | 2574   | 3387    | 0.76            | 2069   | 3354    | 0.62            | 6734      | 10174   | 0.66            | 2202              | 4167    | 0.53            |
| <b>Splanchnic thrombosis</b>                                             | 147    | 3436    | 0.04            | 160    | 3392    | 0.05            | 122    | 3361    | 0.04            | 429       | 10188   | 0.04            | 207               | 4171    | 0.05            |
| <b>Other venous thrombosis<sup>d</sup></b>                               | 672    | 3435    | 0.20            | 832    | 3390    | 0.25            | 747    | 3359    | 0.22            | 2251      | 10184   | 0.22            | 1189              | 4169    | 0.29            |

Abbreviations:

PY: person years; IR: Incidence rate

<sup>a</sup> Incidence rate per 1,000 person years.

<sup>b</sup> Full name: Occlusion and stenosis of precerebral or cerebral arteries, not resulting in cerebral infarction.

<sup>c</sup> Including angitis hypersensitiva, angitis hypersensitiva with Schönlein-Henochs purpura, Buerger's syndrome, Goodpasture syndrome, microangiopathia thrombotica, other necrotising vasculitis, and thrombotic thrombocytopenic purpura.

<sup>d</sup> Including embolism and thrombosis in non-specified veins, embolism and thrombosis in other specified veins, and embolism and thrombosis of caval vein

## Supplementary Table 5

General population incidence rates for thrombocytopenia and coagulative disorders and bleeding events in Denmark, stratified by calendar year

| Outcome                                           | 2016   |         |                 | 2017   |         |                 | 2018   |         |                 | 2016-2018 |         |                 | 2020 - March 2021 |         |                 |
|---------------------------------------------------|--------|---------|-----------------|--------|---------|-----------------|--------|---------|-----------------|-----------|---------|-----------------|-------------------|---------|-----------------|
|                                                   | Events | 1000 PY | IR <sup>a</sup> | Events | 1000 PY | IR <sup>a</sup> | Events | 1000 PY | IR <sup>a</sup> | Events    | 1000 PY | IR <sup>a</sup> | Events            | 1000 PY | IR <sup>a</sup> |
| <b>THROMBOCYTOPENIA AND COAGULATIVE DISORDERS</b> | 2267   | 3433    | 0.66            | 2187   | 3386    | 0.65            | 1641   | 3354    | 0.49            | 6095      | 10173   | 0.60            | 2056              | 4166    | 0.49            |
| <b>Thrombocytopenias</b>                          | 629    | 3435    | 0.18            | 451    | 3391    | 0.13            | 430    | 3360    | 0.13            | 1510      | 10186   | 0.15            | 454               | 4170    | 0.11            |
| Idiopathic thrombocytopenic purpura               | 287    | 3436    | 0.08            | 235    | 3391    | 0.07            | 157    | 3361    | 0.05            | 679       | 10187   | 0.07            | 157               | 4170    | 0.04            |
| Other primary thrombocytopenia                    | 16     | 3436    | 0.00            | 5      | 3392    | 0.00            | 7      | 3361    | 0.00            | 28        | 10189   | 0.00            | 14                | 4171    | 0.00            |
| Secondary thrombocytopenia                        | 45     | 3436    | 0.01            | 27     | 3392    | 0.01            | 37     | 3361    | 0.01            | 109       | 10189   | 0.01            | 30                | 4171    | 0.01            |
| Thrombocytopenia unspecified                      | 344    | 3436    | 0.10            | 253    | 3391    | 0.07            | 290    | 3361    | 0.09            | 887       | 10187   | 0.09            | 298               | 4171    | 0.07            |
| <b>Coagulative disorders</b>                      | 1654   | 3434    | 0.48            | 1751   | 3388    | 0.52            | 1223   | 3356    | 0.36            | 4628      | 10177   | 0.45            | 1615              | 4167    | 0.39            |
| Coagulative disorders, purpura                    | 1654   | 3434    | 0.48            | 1751   | 3388    | 0.52            | 1223   | 3356    | 0.36            | 4628      | 10177   | 0.45            | 1615              | 4167    | 0.39            |
| Disseminated intravascular coagulation (DIC)      | 50     | 3436    | 0.01            | 29     | 3392    | 0.01            | 26     | 3361    | 0.01            | 105       | 10189   | 0.01            | 17                | 4171    | 0.00            |
| <b>BLEEDING EVENTS</b>                            | 9760   | 3420    | 2.85            | 9182   | 3367    | 2.73            | 8902   | 3328    | 2.68            | 27844     | 10114   | 2.75            | 10240             | 4154    | 2.47            |
| <b>Bleedings</b>                                  | 9413   | 3420    | 2.75            | 8875   | 3367    | 2.64            | 8682   | 3329    | 2.61            | 26970     | 10117   | 2.67            | 9885              | 4155    | 2.38            |
| Anemia from bleeding                              | 403    | 3436    | 0.12            | 356    | 3391    | 0.10            | 321    | 3360    | 0.10            | 1080      | 10187   | 0.11            | 343               | 4171    | 0.08            |
| Bleeding from respiratory tract                   | 2832   | 3432    | 0.83            | 2851   | 3385    | 0.84            | 2941   | 3352    | 0.88            | 8624      | 10169   | 0.85            | 3316              | 4166    | 0.80            |
| Bleeding, not specified                           | 446    | 3436    | 0.13            | 502    | 3391    | 0.15            | 581    | 3360    | 0.17            | 1529      | 10186   | 0.15            | 777               | 4170    | 0.19            |
| Hematuria                                         | 5165   | 3426    | 1.51            | 4790   | 3377    | 1.42            | 4563   | 3342    | 1.37            | 14518     | 10146   | 1.43            | 5074              | 4163    | 1.22            |
| Intestinal bleeding                               | 731    | 3435    | 0.21            | 575    | 3390    | 0.17            | 504    | 3360    | 0.15            | 1810      | 10185   | 0.18            | 513               | 4171    | 0.12            |
| <b>Hemolytic anemias<sup>b</sup></b>              | 366    | 3436    | 0.11            | 321    | 3391    | 0.09            | 246    | 3360    | 0.07            | 933       | 10187   | 0.09            | 383               | 4170    | 0.09            |

Abbreviations:

PY: person years; IR: Incidence rate

<sup>a</sup> Incidence rate per 1,000 person years.

<sup>b</sup> Including hemolytic anemia, hemolytic uremic syndrome, and paroxysmal nocturnal haemoglobinuria.

## Supplementary Table 6

General population incidence rates for arterial events and venous thromboembolism in Norway, stratified by calendar year.

| Outcome                                                                  | 2018   |         |                 | 2019   |         |                 | 2018-2019 |         |                 | 2020 - March 2021 |         |                 |
|--------------------------------------------------------------------------|--------|---------|-----------------|--------|---------|-----------------|-----------|---------|-----------------|-------------------|---------|-----------------|
|                                                                          | Events | 1000 PY | IR <sup>a</sup> | Events | 1000 PY | IR <sup>a</sup> | Events    | 1000 PY | IR <sup>a</sup> | Events            | 1000 PY | IR <sup>a</sup> |
| <b>ARTERIAL VASCULAR EVENTS</b>                                          | 15786  | 3315    | 4.76            | 15263  | 3276    | 4.66            | 31049     | 6591    | 4.71            | 18457             | 3977    | 4.64            |
| <b>Cardiac events</b>                                                    | 11972  | 3322    | 3.60            | 11552  | 3286    | 3.52            | 23524     | 6608    | 3.56            | 13901             | 3986    | 3.49            |
| Acute myocardial infarction (AMI)                                        | 3882   | 3339    | 1.16            | 4180   | 3311    | 1.26            | 8062      | 6650    | 1.21            | 4654              | 4007    | 1.16            |
| Ischaemic heart disease without AMI                                      | 11289  | 3324    | 3.40            | 10833  | 3288    | 3.29            | 22122     | 6612    | 3.35            | 13137             | 3987    | 3.29            |
| <b>Cerebrovascular events</b>                                            | 3970   | 3339    | 1.19            | 4048   | 3310    | 1.22            | 8018      | 6649    | 1.21            | 4805              | 4007    | 1.20            |
| Cerebral infarction                                                      | 2395   | 3342    | 0.72            | 2596   | 3314    | 0.78            | 4991      | 6656    | 0.75            | 2974              | 4010    | 0.74            |
| Intracerebral haemorrhage (ICH)                                          | 462    | 3345    | 0.14            | 502    | 3319    | 0.15            | 964       | 6664    | 0.14            | 642               | 4014    | 0.16            |
| Occlusion and stenosis not resulting in cerebral infarction <sup>b</sup> | 742    | 3344    | 0.22            | 659    | 3318    | 0.20            | 1401      | 6662    | 0.21            | 833               | 4014    | 0.21            |
| Stroke unspecified                                                       | 236    | 3345    | 0.07            | 189    | 3320    | 0.06            | 425       | 6665    | 0.06            | 181               | 4015    | 0.05            |
| Subarachnoid haemorrhage (SAH)                                           | 303    | 3345    | 0.09            | 323    | 3320    | 0.10            | 626       | 6664    | 0.09            | 350               | 4015    | 0.09            |
| Transient cerebral ischemic attack                                       | 305    | 3345    | 0.09            | 325    | 3319    | 0.10            | 630       | 6664    | 0.09            | 395               | 4014    | 0.10            |
| <b>Other arterial events</b>                                             | 369    | 3344    | 0.11            | 319    | 3319    | 0.10            | 688       | 6663    | 0.10            | 393               | 4013    | 0.10            |
| <b>VENOUS THROMBOEMBOLISM</b>                                            | 4125   | 3339    | 1.24            | 4233   | 3310    | 1.28            | 8358      | 6649    | 1.26            | 5203              | 4006    | 1.30            |
| <b>Cerebral venous thrombosis</b>                                        | 35     | 3345    | 0.01            | 30     | 3320    | 0.01            | 65        | 6665    | 0.01            | 55                | 4015    | 0.01            |
| <b>Pulmonary embolism</b>                                                | 1851   | 3342    | 0.55            | 1968   | 3316    | 0.59            | 3819      | 6658    | 0.57            | 2515              | 4011    | 0.63            |
| <b>Lower limb thrombosis</b>                                             | 1552   | 3343    | 0.46            | 1638   | 3316    | 0.49            | 3190      | 6659    | 0.48            | 1809              | 4012    | 0.45            |
| Deep thrombophlebitis of veins in legs                                   | 1218   | 3343    | 0.36            | 1312   | 3317    | 0.40            | 2530      | 6660    | 0.38            | 1446              | 4013    | 0.36            |
| Unspecified deep thrombophlebitis in lower limb                          | 161    | 3345    | 0.05            | 189    | 3320    | 0.06            | 350       | 6665    | 0.05            | 171               | 4015    | 0.04            |
| <b>Splancnic thrombosis</b>                                              | 198    | 3345    | 0.06            | 201    | 3320    | 0.06            | 399       | 6665    | 0.06            | 240               | 4015    | 0.06            |
| <b>Other venous thrombosis<sup>d</sup></b>                               | 1240   | 3343    | 0.37            | 1154   | 3317    | 0.35            | 2394      | 6661    | 0.36            | 1442              | 4013    | 0.36            |

Abbreviations:

PY: person years; IR: Incidence rate

<sup>a</sup> Incidence rate per 1,000 person years.

<sup>b</sup> Full name: Occlusion and stenosis of precerebral or cerebral arteries, not resulting in cerebral infarction.

<sup>c</sup> Including angitis hypersensitiva, angitis hypersensitiva with Schönlein-Henochs purpura, Buerger's syndrome, Goodpasture syndrome, microangiopathia thrombotica, other necrotising vasculitis, and thrombotic thrombocytopenic purpura.

<sup>d</sup> Including embolism and thrombosis in non-specified veins, embolism and thrombosis in other specified veins, and embolism and thrombosis of caval vein



## Supplementary Table 7

General population incidence rates for thrombocytopenia and coagulative disorders and bleeding events in Norway, stratified by calendar year

| Outcome                                           | 2018   |         |                 | 2019   |         |                 | 2018-2019 |         |                 | 2020 - March 2021 |         |                 |
|---------------------------------------------------|--------|---------|-----------------|--------|---------|-----------------|-----------|---------|-----------------|-------------------|---------|-----------------|
|                                                   | Events | 1000 PY | IR <sup>a</sup> | Events | 1000 PY | IR <sup>a</sup> | Events    | 1000 PY | IR <sup>a</sup> | Events            | 1000 PY | IR <sup>a</sup> |
| <b>THROMBOCYTOPENIA AND COAGULATIVE DISORDERS</b> | 2521   | 3341    | 0.75            | 2445   | 3314    | 0.74            | 4966      | 6655    | 0.75            | 3011              | 4010    | 0.75            |
| <b>Thrombocytopenia</b>                           | 1290   | 3343    | 0.39            | 1228   | 3317    | 0.37            | 2518      | 6661    | 0.38            | 1513              | 4013    | 0.38            |
| Idiopathic thrombocytopenic purpura               | 218    | 3345    | 0.07            | 181    | 3320    | 0.05            | 399       | 6664    | 0.06            | 233               | 4014    | 0.06            |
| Other primary thrombocytopenia                    | 18     | 3345    | 0.01            | 27     | 3320    | 0.01            | 45        | 6665    | 0.01            | 34                | 4015    | 0.01            |
| Secondary thrombocytopenia                        | 585    | 3344    | 0.17            | 583    | 3319    | 0.18            | 1168      | 6664    | 0.18            | 696               | 4014    | 0.17            |
| Thrombocytopenia unspecified                      | 655    | 3344    | 0.20            | 674    | 3319    | 0.20            | 1329      | 6663    | 0.20            | 785               | 4014    | 0.20            |
| <b>Coagulative disorders</b>                      | 1285   | 3343    | 0.38            | 1258   | 3317    | 0.38            | 2543      | 6660    | 0.38            | 1556              | 4012    | 0.39            |
| Coagulative disorders, purpura                    | 1285   | 3343    | 0.38            | 1258   | 3317    | 0.38            | 2543      | 6660    | 0.38            | 1556              | 4012    | 0.39            |
| Disseminated intravascular coagulation (DIC)      | 61     | 3345    | 0.02            | 59     | 3320    | 0.02            | 120       | 6665    | 0.02            | 63                | 4015    | 0.02            |
| <b>BLEEDING EVENTS</b>                            | 10286  | 3329    | 3.09            | 9857   | 3295    | 2.99            | 20143     | 6624    | 3.04            | 10451             | 3996    | 2.62            |
| <b>Bleedings</b>                                  | 10020  | 3330    | 3.01            | 9597   | 3295    | 2.91            | 19617     | 6625    | 2.96            | 10175             | 3997    | 2.55            |
| Anemia from bleeding                              | 2037   | 3342    | 0.61            | 1988   | 3315    | 0.60            | 4025      | 6658    | 0.60            | 2309              | 4012    | 0.58            |
| Bleeding from respiratory tract                   | 2978   | 3341    | 0.89            | 2801   | 3313    | 0.85            | 5779      | 6654    | 0.87            | 3008              | 4010    | 0.75            |
| Bleeding, not specified                           | 152    | 3345    | 0.05            | 155    | 3320    | 0.05            | 307       | 6665    | 0.05            | 187               | 4015    | 0.05            |
| Hematuria                                         | 5055   | 3337    | 1.51            | 4916   | 3307    | 1.49            | 9971      | 6645    | 1.50            | 4890              | 4006    | 1.22            |
| <b>Hemolytic anemias<sup>b</sup></b>              | 288    | 3345    | 0.09            | 290    | 3319    | 0.09            | 578       | 6664    | 0.09            | 308               | 4014    | 0.08            |

Abbreviations:

PY: person years; IR: Incidence rate

<sup>a</sup> Incidence rate per 1,000 person years.

<sup>b</sup> Including hemolytic anemia, hemolytic uremic syndrome, and paroxysmatic nocturnal haemoglobinuria.
